# Plasma Adrenomedullin Levels in Type 1 Diabetes

## Relationship with clinical parameters

M.T. GARCÍA-UNZUETA, MD  
C. MONTALBÁN, MD  
C. PESQUERA, MD

J.R. BERRAZUETA, MD  
J.A. AMADO, MD

**OBJECTIVE** — To assess the relationship between plasma adrenomedullin (AM) levels and the presence of microvascular complications in type 1 diabetic patients.

**RESEARCH DESIGN AND METHODS** — We measured plasma AM and cAMP levels in 103 type 1 diabetic patients (46 without complications, 24 with retinopathy only, 14 with microalbuminuria but normal kidney function, and 19 with renal insufficiency) and 41 matched healthy control subjects.

**RESULTS** — Patients with renal insufficiency had higher levels of AM and cAMP than all other groups. Patients with only retinopathy showed a trend to have higher levels than patients without complications. There were no differences among all other groups. There was a significant correlation between AM and cAMP in the total diabetic group ( $r_s = 0.36$ ,  $P < 0.001$ ) but not in the control group. In multiple regression analysis, plasma AM demonstrated significant relationships with creatinine clearance ( $\beta = -0.31$ ,  $P = 0.004$ ) and duration of the disease ( $\beta = 0.28$ ,  $P = 0.008$ ).

**CONCLUSIONS** — Plasma AM and cAMP are increased in type 1 diabetic patients with renal insufficiency. Creatinine clearance (CrClc) and duration of the disease are related to plasma AM levels in these patients.

Human adrenomedullin (AM) is a recently identified 52-amino acid peptide that was originally isolated from an extract of pheochromocytoma tissue (1). This vasodilatory peptide has sequence homology to calcitonin gene-related peptide (1). AM is produced not only in normal adrenal medulla, but also in the lungs, kidneys, and cardiovascular system (heart, endothelial, and vascular smooth muscle cells) (2). The major source of circulating AM is probably the vascular endothelium rather than the adrenal gland (3,4). AM, acting as an autocrine, paracrine, or endocrine vasorelaxing factor, may be important in the regulation of local and systemic vascular tone (5). AM increases intracellular cAMP in vascular

smooth muscle cells via its specific receptors, although an endothelium-derived nitric oxide-dependent vasorelaxing mechanism is also involved (5).

Plasma AM levels are increased in different clinical situations, such as essential arterial hypertension (6–8), congestive heart failure (8,9), acute myocardial infarction (10), chronic renal failure (6,8), liver cirrhosis (8), or sepsis (11). The source of AM in these situations is probably the cardiovascular system, as a consequence of endothelial activation. Plasma levels of AM correlate significantly with those of cAMP in hypertension and renal failure (6).

Generalized vasodilatation is observed from diagnosis in type 1 diabetes (12). This vasodilatation is more evident in the afferent

arteriole, and it is believed to lead to capillary hypertension, thus contributing to the development of microangiopathy (12). Many different mechanisms seem to be responsible for this phenomenon (12). It has been recently reported that AM is able to induce relaxation in isolated canine retinal arteries (13) and to increase the diameter of both afferent and efferent glomerular arterioles (14). On the other hand, some type 1 diabetic patients develop microalbuminuria. These patients have generalized dysfunction of the vascular endothelium, as evidenced by a high rate of transcapillary albumin escape and raised levels of von Willebrand factor, tissue-type plasminogen activator, etc. (12). In this context, AM could be a new marker of endothelial dysfunction. Finally, some patients progress toward renal insufficiency, a situation in which high plasma AM levels have been reported (6,8).

Hayashi et al. (15) have recently reported that plasma AM levels were increased in a small group of poorly controlled diabetic patients without renal failure. To the best of our knowledge, the potential role of AM in the pathogenesis of diabetic vascular complications has not been studied. The aim of this study was to assess whether plasma AM levels were abnormal in uncomplicated type 1 diabetic patients and in those with different degrees of microangiopathy. We also evaluated the relationship between AM and cAMP levels and other clinical parameters in these patients.

### RESEARCH DESIGN AND METHODS

Table 1 summarizes the clinical details of the healthy control and diabetic groups. There were no differences in age, distribution of sexes, or BMI among the different groups. Diabetic patients were regularly treated in our hospital outpatient clinics and were metabolically stable. They were included consecutively into this cross-sectional study after having given informed consent. The protocol was approved by the Investigation Committee of our institution. Diagnosis of type 1 diabetes was established by onset of the diabetes before 30 years, insulin dependency from diagnosis, and lack

From the Endocrine Unit (M.I.G.-U., C.M., C.P., J.A.A.) and the Cardiology Service (J.R.B.), Hospital Universitario Marqués de Valdecilla, Universidad de Cantabria, Santander, Spain.

Address correspondence and reprint requests to J.A. Amado, S. Endocrinología, Hospital Universitario Marqués de Valdecilla, Valdecilla St., 39008 Santander, Spain. E-mail: amadoja@galeno.medi.unican.es.

Received for publication 26 August 1997 and accepted in revised form 19 February 1998.

**Abbreviations:** AM, adrenomedullin; CrClc, creatinine clearance; HPLC, high-performance liquid chromatography; RIA, radioimmunoassay; TFA, trifluoroacetic acid.

Table 1—Clinical details

|                          | Control group | Without complications (group 1) | Only retinopathy (group 2) | Microalbuminuria (group 3) | Renal insufficiency (group 4) |
|--------------------------|---------------|---------------------------------|----------------------------|----------------------------|-------------------------------|
| n                        | 41            | 46                              | 24                         | 14                         | 19                            |
| Sex (M/F)                | 17/24         | 20/26                           | 10/14                      | 5/9                        | 10/9                          |
| Age (years)              | 37 ± 9        | 37 ± 5                          | 38 ± 8                     | 37 ± 9                     | 42 ± 11                       |
| Disease duration (years) | 36 (25–56)    | 36 (30–56)                      | 39 (21–54)                 | 38 (22–55)                 | 42 (22–63)                    |
|                          | —             | 9.2 ± 6.7                       | 17.5 ± 8.1                 | 18.5 ± 7.6                 | 20.8 ± 6.9                    |
|                          | —             | 8 (1–28)                        | 17 (4–31)                  | 18.5 (5–33)                | 21 (7–34)                     |
| Smokers                  | 10            | 12                              | 7                          | 6                          | 3                             |
| BMI (kg/m <sup>2</sup> ) | 23.7 ± 3.3    | 24.3 ± 2.7                      | 25.1 ± 3.5                 | 25.7 ± 3.1                 | 24.4 ± 3.3                    |
|                          | 23 (18–32)    | 23 (19–32)                      | 25 (18–31)                 | 25 (20–31)                 | 23 (18–30)                    |

Data are n or means ± SD and median (range).

of response of C-peptide after glucagon administration. Exclusion criteria were congestive heart failure, liver cirrhosis, chronic obstructive pulmonary disease, asthma, or sepsis. Diabetic patients were classified in four groups: 1) without any kind of vascular complications, 2) with retinopathy only, 3) with microalbuminuria but normal serum creatinine levels, and 4) with renal insufficiency. Presence of diabetic retinopathy was diagnosed by ophthalmoscopy after pupil dilatation by a specialized ophthalmologist and was scored as nonproliferative or proliferative. Patients were considered hypertensive when blood pressure was  $\geq 140$  mmHg for systolic and  $\geq 90$  mmHg for diastolic for three consecutive measurements over a period of 4 weeks (16). Microalbuminuria was diagnosed when first morning urine sample albumin-to-creatinine ratio was between 30 and 300 mg/g in two separate specimens, excluding urinary infection (17). Renal insufficiency was diagnosed when serum creatinine levels were persistently  $>1.3$  mg/dl. Patients in groups 1 and 2 were on treatment only with insulin. In group 2, 21 patients had simple retinopathy, and 3 had proliferative retinopathy. None of them had arterial hypertension. In group 3, two patients did not have retinopathy, eight had simple retinopathy, and four had proliferative retinopathy. Three patients had arterial hypertension. Ten had been on treatment with ACE inhibitors for at least 6 months. Some were also on treatment with diuretics or hypolipemic drugs. Patients in groups 2 and 3 did not present a previous history of cardiac angina, intermittent claudication, or myocardial or cerebral infarction, and resting electrocardiogram was normal. In group 4, 1 patient had simple retinopathy, and 17 had proliferative retinopathy. Three patients were on

hemodialysis. Eight had symptomatic macroangiopathy. Thirteen patients were on treatment with ACE inhibitors, seven with diuretics, one with calcium channel inhibitors, and four with statins.

Fasting venous blood samples were obtained after 30 min of supine rest from an antecubital vein before the morning injection of insulin. Glucose, creatinine, and cholesterol were measured by automated methods on a Technicon Dax (Technicon Instruments, Tarrytown, NY), using the reagents supplied by Boehringer-Mannheim (Mannheim, Germany). CrCl<sub>c</sub> was calculated with the Cockcroft-Gault formula (18). HbA<sub>1c</sub> was determined by automated high-performance liquid chromatography (HPLC) (Diamat; BioRad, Munich, Germany). Urine albumin excretion rate was quantified by immunoturbidimetry (Behring Nephelometer Analyzer II; Behring Diagnostics, Marburg, Germany).

AM was measured using the kit supplied by Peninsula Lab (Belmont, CA), following the manufacturer's instructions. Blood was obtained using a chilled syringe and immediately transferred into a chilled polypropylene tube containing EDTA (1 mg/ml of blood) and aprotinin (500 kU/ml of blood). Blood was centrifuged at 1,600g for 15 min at 4°C. Plasma was immediately frozen and stored at  $-80^{\circ}\text{C}$  until assayed. Plasma AM concentration was measured by a specific radioimmunoassay (RIA) after extraction through the Sep-Pak C-18 column supplied by the manufacturer. First, 1 ml plasma was acidified with 1 ml of 1% trifluoroacetic acid in distilled water (TFA) (HPLC grade, Merck, Darmstadt, Germany) and centrifuged at 8,000g for 20 min at 4°C. Columns containing 200 mg of C-18 were equilibrated by washing with 1 ml of 60% acetonitrile (Merck) in 1% TFA (once) fol-

lowed by 3 ml of 1% TFA (three times). Acidified plasma was added to the pre-treated columns without applying pressure. The columns were slowly washed with 3 ml of TFA (twice), and the wash was discarded. The peptide was eluted very slowly with 3 ml of 60% acetonitrile in 1% TFA, and the eluant was collected in a polypropylene tube. Eluant was evaporated using a Speed-Vac Concentrator SVC 100 H (Savant Instruments, Farmingdale, NY). The recovery of AM after extraction was determined by adding AM to plasma before extraction and was 78%. On the next day, the residue was dissolved in 250  $\mu\text{l}$  of RIA buffer, vortexed, and centrifuged at 8,000g, and two aliquots of 100  $\mu\text{l}$  were used to assay. Standard peptide (1.28  $\mu\text{g}$ ) was reconstituted with 1 ml of RIA buffer, and successive dilutions were made to achieve an effective range of the standard curve between 10 and 1,280 pg/ml. Rabbit anti-AM antiserum, <sup>125</sup>I-AM, and precipitating agents were prepared and used according the manufacturer's instructions. Radioactivity was measured using an LKB Wallac 1272 Clin-iGamma Counter (Turku, Finland). The results were automatically calculated using logit B/Bo vs. ln concentration, and the final results were divided by four (concentration factor). This assay does not show any cross-reactivity with human AM (13–52), human CGPR, endothelin-1, atrial natriuretic peptide, brain natriuretic peptide, or C-type natriuretic peptide. Sensitivity was 5 pg/ml. Interassay and intra-assay coefficients of variation were 15 and 10%, respectively. To diminish variability, in each assay we matched a similar number of samples of the different groups.

Plasmatic cAMP levels were measured by RIA (Inctstar, Stillwater, MN) after preliminary acetylation of the samples.

Table 2—Biochemical parameters

|                                                   | Control group                    | Without complications<br>(group 1) | Only retinopathy<br>(group 2)    | Microalbuminuria<br>(group 3)    | Renal insufficiency<br>(group 4) |
|---------------------------------------------------|----------------------------------|------------------------------------|----------------------------------|----------------------------------|----------------------------------|
| Glucose (mg/dl)                                   | 90 ± 12<br>89 (68–119)           | 167 ± 80<br>148 (40–360)           | 168 ± 88<br>158 (55–359)         | 192 ± 97<br>196 (47–365)         | 188 ± 138<br>123 (46–578)        |
| HbA <sub>1c</sub> (%)                             | 5.3 ± 0.3<br>5.3 (4.8–6.3)       | 8.2 ± 1.4<br>8 (5.1–1.3)           | 8.2 ± 1.1<br>8 (6.7–11.6)        | 9.4 ± 1.3<br>9.9 (7.3–11.1)      | 9.4 ± 1.6<br>9.1 (6.6–13.3)      |
| Creatinine (mg/dl)                                | 0.99 ± 0.11<br>1 (0.8–1.2)       | 1.01 ± 0.12<br>1 (0.8–1.2)         | 1.00 ± 0.14<br>1 (0.8–1.2)       | 1.02 ± 0.12<br>1.1 (0.8–1.2)     | 2.56 ± 1.56<br>1.7 (1.3–7.1)     |
| CrClc (ml · min <sup>-1</sup> · m <sup>-2</sup> ) | 85.1 ± 10.5<br>85.6 (63.6–117.2) | 86.6 ± 10.4<br>87.5 (63.7–112.6)   | 86.2 ± 14.3<br>82.3 (64.6–113.6) | 84.7 ± 11.2<br>87.4 (58.1–100.1) | 41.2 ± 17.5<br>46.2 (8.7–66.5)   |
| Microalbuminuria<br>(mg:g creatinine)             | —                                | 8.9 ± 6.9<br>6.3 (0.6–27.3)        | 7.5 ± 3.7<br>6.5 (3.1–18.2)      | 133.3 ± 97<br>106.3 (31–305)     | —                                |
| Proteinuria (g/24 h)                              | —                                | —                                  | —                                | —                                | 2.17 ± 1.52<br>2 (0.2–5)         |
| Cholesterol (mg/dl)                               | 189 ± 37<br>188 (120–246)        | 175 ± 28<br>172 (126–246)          | 193 ± 40<br>194 (131–291)        | 180 ± 48<br>171 (84–290)         | 205 ± 43<br>197 (156–313)        |
| AM (pg/ml)                                        | 82.7 ± 40.8<br>93 (15–172)       | 78.1 ± 28 ± 1<br>77 (16–155)       | 101.4 ± 40<br>91.5 (48–178)      | 96.4 ± 44.5<br>87.5 (48–192)     | 235.7 ± 138.8<br>188 (81–555)    |
| cAMP (nmol/l)                                     | 9.4 ± 1.7<br>9 (6.5–14)          | 8.8 ± 2.0<br>9 (5–13.5)            | 9.4 ± 2.6<br>9.5 (6.5–18)        | 9.8 ± 2.3<br>9.3 (7.5–16.5)      | 12.2 ± 3.1<br>11 (9–20.6)        |

Data are means ± SD and median (range).

All values are given as means ± SD and medians (range). When comparing more than two nonnormally distributed variables, the Kruskal-Wallis test was used. If differences were found, the Mann-Whitney test with Bonferroni adjustment was used for comparisons between two groups. For normally distributed variables, analysis of variance was performed. If differences were found, Scheffe's test was used for comparison between two groups. Correlation between AM and cAMP levels was done using Spearman's coefficient, since they were nonnormally distributed. When considering possible associations to AM levels, multiple regression analysis (stepwise selection) was used after logarithmic transformation of the nonnormally distributed variables. The following variables were studied: age, BMI, duration of diabetes, blood glucose, HbA<sub>1c</sub>, cholesterol, albumin excretion rate, and calculated CrClc.

All calculations were made with Statistical Package for the Social Sciences software (SPSS, Chicago). A *P* value <0.05 was considered statistically significant.

**RESULTS** — Table 2 shows the biochemical parameters of the control and diabetic groups. As expected, glucose and HbA<sub>1c</sub> were higher than normal in all diabetic groups. Group 4 patients (with renal insufficiency) had higher levels of AM than all other groups (*P* < 0.001). The levels of

AM in the three patients on hemodialysis were 160, 525, and 555 pg/ml. Group 2 patients (with only retinopathy) also showed a trend toward higher levels of AM than group 1 (*P* = 0.039), but because of the exigency of Bonferroni's adjustment, the comparison did not reach statistical significance. Plasma cAMP levels in group 4 were higher than in all other groups (*P* < 0.007), but no differences were found among the other groups. There was a significant correlation between AM and

cAMP in the total diabetic group (Spearman's *r* coefficient 0.36, *P* < 0.001) (Fig. 1) but not in the control group. No correlation was found between plasma AM and blood pressure in any group. In multiple regression analysis, plasma AM demonstrated a significant inverse relationship with CrClc (coefficient  $\beta$  -0.31, *P* = 0.004) and a positive relationship with duration of the disease (coefficient  $\beta$  0.28, *P* = 0.008), according to the formula  $\log AM = 2.17 - (0.004 \times CrClc) + (0.007 \times duration)$ .

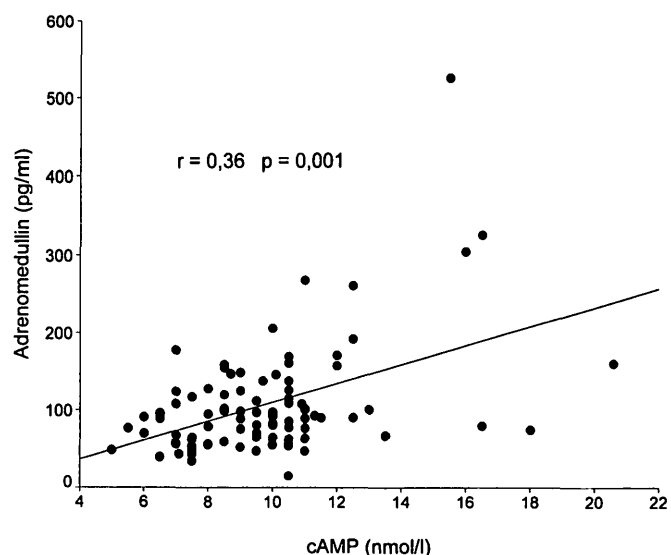

Figure 1—Correlation between AM and cAMP in the entire group of type 1 diabetic patients.

**CONCLUSIONS** — The levels of plasma AM in our control group are higher than those reported previously by other authors (6–10), but they are similar to those reported by another European group (19), and even higher levels than ours have been reported in normal women, using the same assay (20). Our data demonstrate that plasma AM levels are clearly increased in type 1 diabetic patients with kidney failure, as reported in other causes of renal insufficiency (6,8). Furthermore, we have found a significant inverse correlation with CrCl<sub>c</sub>, suggesting that as kidney function deteriorates, AM increases proportionally. The increase in AM levels could be the result of a decreased clearance of the peptide by the kidney, although most of the circulating AM seems to be metabolized in the pulmonary circulation (3,6). Alternatively, high AM levels may reflect endothelial activation, since this peptide may be involved in protective mechanisms against blood pressure elevation and/or body fluid volume expansion (6). The positive correlation in diabetic patients between AM and cAMP, a second messenger involved in the regulation of the circulatory system, supports the hypothesis that AM plays an active counterregulatory role, preventing excessive vasoconstriction, promoting natriuresis and, possibly, inhibiting excessive platelet aggregation (21). The trend to higher levels in patients with retinopathy also raises the intriguing possibility that AM may be somehow involved in the pathogenesis of diabetic retinopathy, since retinal arteries are known targets of this peptide (13). It has been recently demonstrated that AM acts as an apoptosis survival factor for endothelial cells (22), so, it may play a protective role in the diabetic retinal vessels. On the other hand, it could also induce vasodilatation of these vessels. The normal levels of AM in patients with microalbuminuria were somewhat unexpected. It is possible that the treatment with ACE inhibitors may have normalized previously elevated AM levels, since these drugs improve endothelial function in these patients (23). It can also be speculated that ACE inhibition itself modifies plasma AM levels. Alternatively, AM could have been lost in urine. Further studies with untreated microalbuminuric patients and/or measuring urine AM excretion are needed to test these hypotheses. The normal levels in patients without complications argue against a primary role of AM in the initial generalized vasodilatation

induced by diabetes, although a local paracrine effect cannot be excluded. The relationship with duration of disease suggests that the elevation of AM levels is a late phenomenon due to endothelial dysfunction. In any case, it seems that AM levels are abnormal in type 1 diabetic patients with vascular complications. Similar preliminary results have been recently reported by Japanese investigators in type 2 diabetic patients (24).

Finally, since AM is produced also in the adrenal medulla, it could be considered that AM levels in some diabetic patients could have been raised in response to hypoglycemia, but careful studies inducing hypoglycemia in normal subjects did not find any response in circulating AM levels, suggesting that AM is not involved in the hypoglycemia-induced counterregulatory hormone response (19). Although our study was not aimed to test this point, we did not find either differences in AM levels in hypoglycemic versus hyperglycemic matched patients or a relationship between plasma glucose or HbA<sub>1c</sub> and AM levels, suggesting that metabolic control, as assessed by these parameters, does not influence AM levels. This point needs clarification, since Hayashi et al. (15) reported that AM mRNA level was increased in the vascular smooth muscle cells cultured in high-glucose medium.

**Acknowledgments** — This study was supported by grants from Fondo de Investigaciones Sanitarias (95/0928) Ministry of Health, Madrid, Spain, and from the Valdecilla Foundation, Santander, Spain.

We gratefully acknowledge the technical assistance of B. Paule and C. Renteria.

#### References

1. Kitamura K, Kangawa K, Kawamoto M, Ichiki Y, Nakamura S, Matsuo H, Eto T: Adrenomedullin: a novel hypotensive peptide isolated from human pheochromocytoma. *Biochem Biophys Res Commun* 192:553–560, 1993
2. Ichiki Y, Kitamura K, Kangawa K, Kawamoto M, Matsuo H, Eto T: Distribution and characterization of immunoreactive adrenomedullin in human tissue and plasma. *FEBS Lett* 338:6–10, 1994
3. Nishikimi T, Kitamura K, Shimada K, Ishimitsu T, Takamiya M, Kangawa K, Matsuo H, Eto T, Omae T, Matsuo H: Clinical studies on the sites of production and clearance of circulating adrenomedullin in human subjects. *Hypertension* 24:600–604, 1994

4. Sugo S, Minamino N, Kangawa K, Miyamoto K, Kitamura K, Sakata J, Eto T, Matsuo H: Endothelial cells actively synthesize and secrete adrenomedullin. *Biochem Biophys Res Commun* 201:1160–1166, 1994
5. Schell DA, Vari RC, Samson WK: Adrenomedullin: a newly discovered hormone controlling fluid and electrolyte homeostasis. *Trends Endocrinol Metab* 7:7–13, 1996
6. Ishimitsu T, Nishikimi T, Saito Y, Kitamura K, Eto T, Kangawa K, Matsuo H, Omae T, Matsuo H: Plasma levels of adrenomedullin, a newly identified hypotensive peptide, in patients with hypertension and renal failure. *J Clin Invest* 94:2158–2161, 1994
7. Kohno M, Hanehira T, Kano H, Horio T, Yokokawa K, Ikeda M, Minami M, Yasunari K, Yoshikawa J: Plasma adrenomedullin concentrations in essential hypertension. *Hypertension* 27:102–107, 1996
8. Cheung B, Leung R: Elevated plasma levels of human adrenomedullin in cardiovascular, respiratory, hepatic and renal disorders. *Clin Sci* 92:59–62, 1997
9. Jougasaki M, Wei C, McKinley LJ, Burnett JC Jr: Elevation of circulating and ventricular adrenomedullin in human congestive heart failure. *Circulation* 92:286–289, 1995
10. Kobayashi K, Kitamura K, Hirayama N, Date H, Kashiwagi T, Ikushima I, Hanada Y, Nagatomo Y, Takenaga M, Ishikawa T, Imamura T, Koiwaya Y, Eto T: Increased plasma adrenomedullin in acute myocardial infarction. *Am Heart J* 131:676–680, 1996
11. Hirata Y, Mitaka C, Sato K, Nagura T, Tsunoda Y, Amaha K, Marumo F: Increased circulating adrenomedullin, a novel vasodilatory peptide in sepsis. *J Clin Endocrinol Metab* 81:1449–1453, 1996
12. Stehouwer CDA, Schaper NC: The pathogenesis of vascular complications of diabetes mellitus: one voice or many?. *Eur J Clin Invest* 26:535–543, 1997
13. Okamura T, Ayajiki K, Kangawa K, Toda N: Mechanism of adrenomedullin-induced relaxation in isolated canine retinal arteries. *Invest Ophthalmol Vis Sci* 38:56–61, 1997
14. Hirata Y, Hayakawa H, Suzuki Y, Ikenouchi H, Kohmoto O, Kimuro K, Kitamura K, Eto T, Kangawa K: Mechanisms of adrenomedullin-induced vasodilatation in the rat kidney. *Hypertension* 25:790–795, 1995
15. Hayashi M, Shimosawa T, Isaka M, Yamada S, Fujita R, Fujita T: Plasma adrenomedullin in diabetes. *Lancet* 350:1449–1450, 1997
16. Treatment of hypertension in diabetes (Consensus Statement). *Diabetes Care* 16:1394–1401, 1993
17. Bennett PH, Haffner S, Kasiske BL, Keane WF, Mogensen CE, Parving HH, Steffes MW, Striker GE: Screening and management of microalbuminuria in patients with diabetes mellitus: recommendations to the Scientific Advisory Board of the National Kidney Foundation from an ad hoc com-

- mittee of the Council on Diabetes Mellitus of the National Kidney Foundation. *Am J Kidney Dis* 25:107–112, 1995
18. Sampson MJ, Drury PL: Accurate estimation of glomerular filtration rate in diabetic nephropathy from age, body weight, and serum creatinine. *Diabetes Care* 15:609–612, 1992
  19. Ehlenz K, Koch B, Preuss P, Simon B, Koop I, Lang RE: High levels of circulating adrenomedullin in severe illness: correlation with C-reactive peptide and evidence against the adrenal medulla as site of origin. *Exp Clin Endocrinol Diabetes* 105:156–162, 1997
  20. Hata T, Miyazaki K, Matsui K: Decreased circulating adrenomedullin in pre-eclampsia. *Lancet* 350:1600, 1997
  21. Nakamura M, Yoshida H, Makita S, Arakawa N, Niinuma H, Hiramori K: Potent and long-lasting vasodilatory effects of adrenomedullin in humans. Comparisons between normal subjects and patients with chronic heart failure. *Circulation* 95:1214–1221, 1997
  22. Kato H, Shichiri M, Marumo F, Hirata Y: Adrenomedullin as an autocrine/paracrine apoptosis survival factor for rat endothelial cells. *Endocrinology* 138:2615–2620, 1997
  23. O'Driscoll G, Green D, Rankin J, Stanton K, Taylor R: Improvement in endothelial function by angiotensin converting enzyme inhibition in insulin-dependent diabetes mellitus. *J Clin Invest* 100:678–684, 1997
  24. Nakamura T, Ishikawa S, Ideno J, Honda K, Rokkaku K, Nagasaka S, Kitamura K, Saito T: Plasma adrenomedullin levels in patients with non insulin dependent diabetes mellitus (NIDDM): close relationship with diabetic complications (Abstract). In *Program of the 79th Annual Meeting of the Endocrine Society, Minneapolis, MN, 11–14 June, 1997*. Bethesda, MD, Endocrine Society Press, 1997, p. 480
